# Supplementary material for: Combination of TNF-α and graphene oxide-loaded BEZ235 to enhance apoptosis of PIK3CA mutant colorectal cancer cells
Source: Royal Society of Chemistry journal article supplement (doi:10.1039/c3tb20764a), 2013-01-01
Supplement: c3tb20764a.pdf [file c3tb20764a.pdf]

## Supporting Information

### Combination of TNF- $\alpha$ and Graphene Oxide-Loaded BEZ235 to Enhance Apoptosis of PIK3CA Mutant Colorectal Cancer Cells

Yuhua Cao,<sup>a,b,c</sup> Yu Chong,<sup>a</sup> He Shen,<sup>a</sup> Mengxin Zhang,<sup>a</sup> Jie Huang,<sup>a</sup> Yimin Zhu,<sup>a</sup>  
and Zhijun Zhang\*<sup>a</sup>

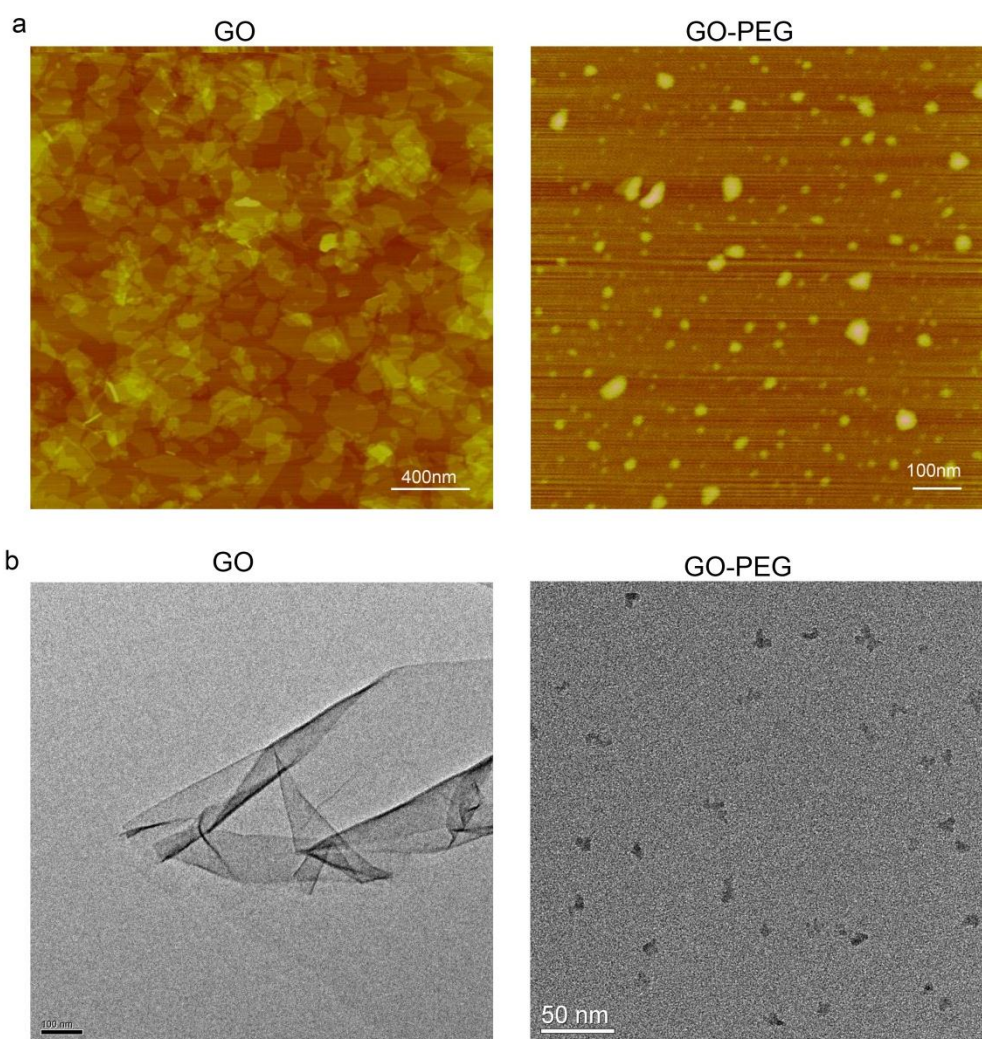

Fig. S1 (a) AFM and (b) TEM images of GO and GO-PEG.

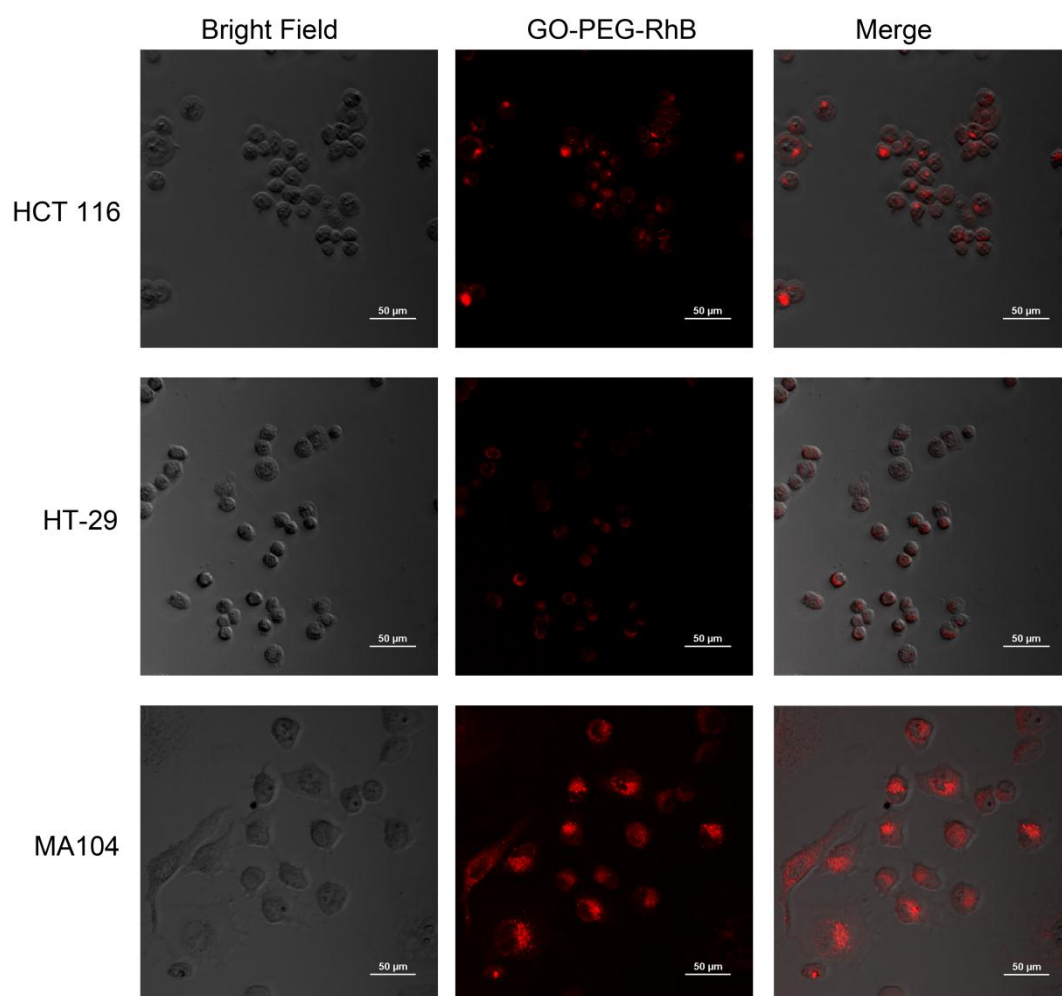

Fig. S2. Confocal fluorescence images of HCT 116, HT-29, and MA 104 cells incubated with GO-PEG labeled with RhB for 2 h at 37 °C.

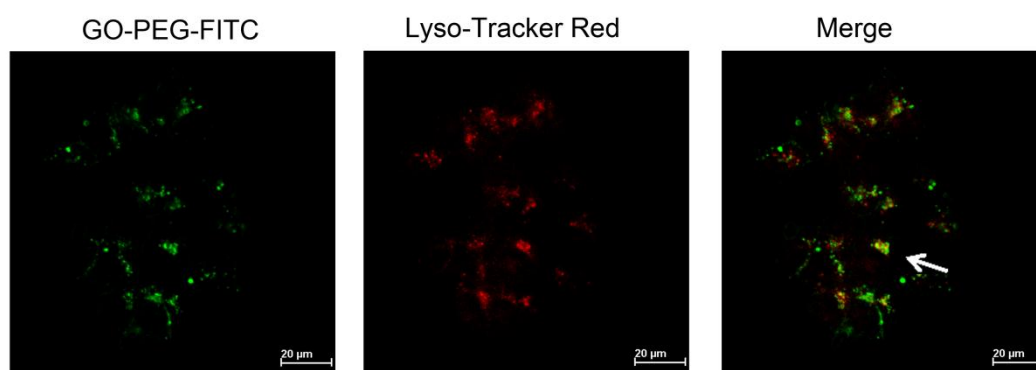

Fig. S3. The cellular uptake pathway of GO-PEG. Confocal fluorescence images of HCT 116 cells incubated with GO-PEG-FITC for 18 h, and then fixed by 4% paraformaldehyde. The lysosomes of the cells were stained Lyso-Tracker Red.
